# Supplementary material
Source: MDPI journal article supplement (https://www.mdpi.com/2311-5629/2/3/20)
Supplement: s1 [file s1]

# Supplementary Materials: Simple Process for Sidewall Modification of Multi-Walled Carbon Nanotubes with Polymer Side Chain Radicals Generated by Ultraviolet-Induced C–Cl Bond Dissociation of Polystyrene Derivatives

Tomoya Takada, Takuma Baba and Shigeaki Abe

Supplementary information for “Simple Process for Sidewall Modification of Multi-walled Carbon Nanotubes with Polymer Side Chain Radicals Generated by Ultraviolet-induced C–Cl Bond Dissociation of Polystyrene Derivatives”

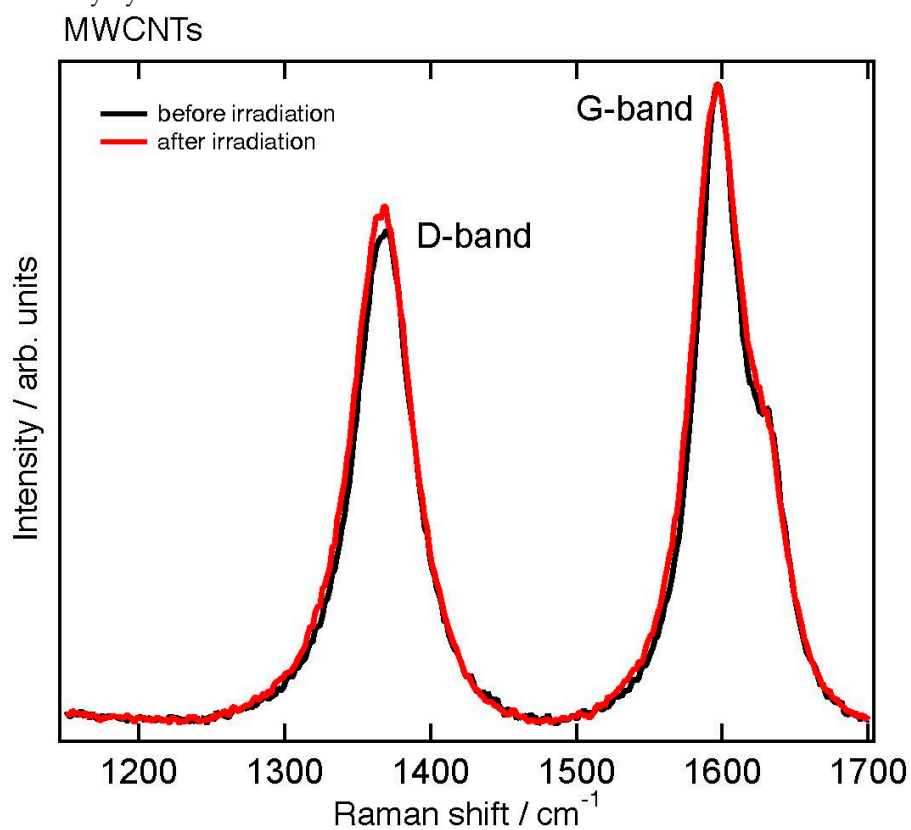

Figure S1. Raman spectra observed for multi-walled carbon nanotubes before and after ultraviolet irradiation.
